# Supplementary material for: Attaining air stability in high performing n-type phthalocyanine based organic semiconductors
Source: Royal Society of Chemistry journal article supplement (doi:10.1039/d1tc02275j), 2021-01-01
Supplement: d1tc02275j1.pdf [file d1tc02275j1.pdf]

## Electronic Supporting Information

# Attaining air stability in high performing n-type phthalocyanine based organic semiconductors

*Nathan J. Yutronkie,<sup>1</sup> Benjamin King,<sup>2</sup> Owen A. Melville,<sup>2</sup>  
Benoit H. Lessard,<sup>2,3,\*</sup> and Jaclyn L. Brusso<sup>1,\*</sup>*

<sup>1</sup>Department of Chemistry and Biomolecular Sciences, University of Ottawa, 150 Louis Pasteur, Ottawa, ON K1N 6N5, Canada

<sup>2</sup>Department of Chemical and Biological Engineering, University of Ottawa, 161 Louis Pasteur, Ottawa, ON K1N 6N5, Canada

<sup>3</sup>School of Electrical Engineering and Computer Science, University of Ottawa, 800 King Edward, Ottawa, ON, K1N 6N5, Canada

### Contents (10 pages)

|                                                         |    |
|---------------------------------------------------------|----|
| Theoretical Calculations                                | S2 |
| UV-Visible Spectroscopy                                 | S3 |
| Single-Crystal X-Ray Diffraction                        | S3 |
| OTFT Testing and Electrical Characterization            | S4 |
| Thin-Film X-Ray Diffraction and Atomic Force Microscopy | S7 |

### Theoretical Calculations.

As illustrated via DFT calculations to approximate the energies of the frontier molecular orbitals (FMOs) of **H<sub>2</sub>-SiPc** juxtaposed to those of **F<sub>2</sub>-SiPc**, axial fluorination has very little impact on the energetics (Figure S1). Incorporating 18 fluorine atoms, on the other hand, leads to a significant drop of the doubly degenerate LUMOs by nearly 1 eV, with an energy of -4.22 eV for the perfluorinated derivative **F<sub>2</sub>-F<sub>16</sub>SiPc**. Not only do these low-lying LUMOs suggest **F<sub>2</sub>-F<sub>16</sub>SiPc<sub>2</sub>** to be an air-stable n-type OSC, but these energies are in close range to the work function of polycrystalline Ag electrodes (i.e., -4.26 eV), thus enhanced performances can be expected as a result of the minimization of the electron injection barrier.

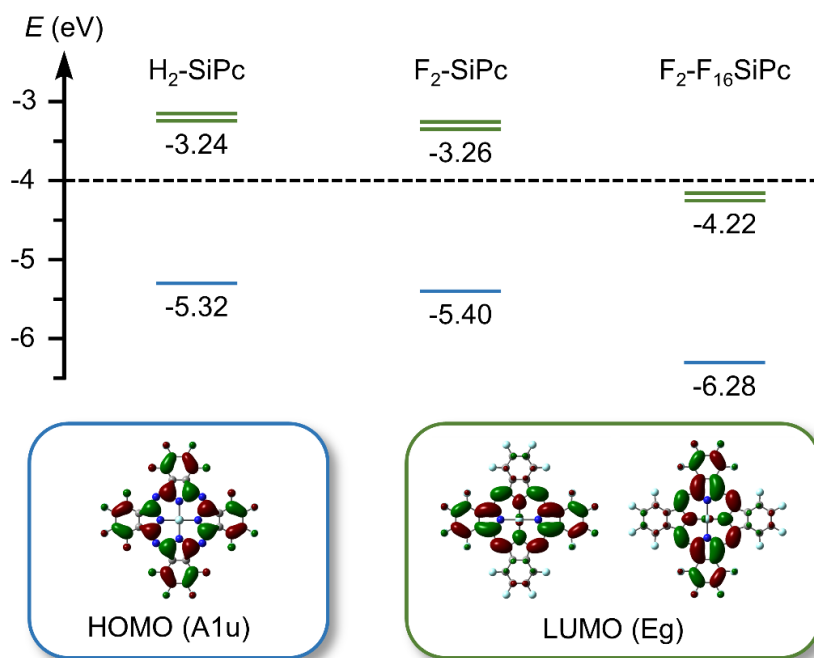

**Figure S1.** Energy level diagram of UB3LYP/6-311G(d,p) calculated HOMO and doubly degenerate LUMOs (as blue and green lines, respectively) from geometry optimized SiPc of D<sub>4h</sub> symmetry (in eV). Dashed line corresponds to the LUMO energy threshold required for air stable electron transport performances in OSCs.

## UV-Visible Spectroscopy.

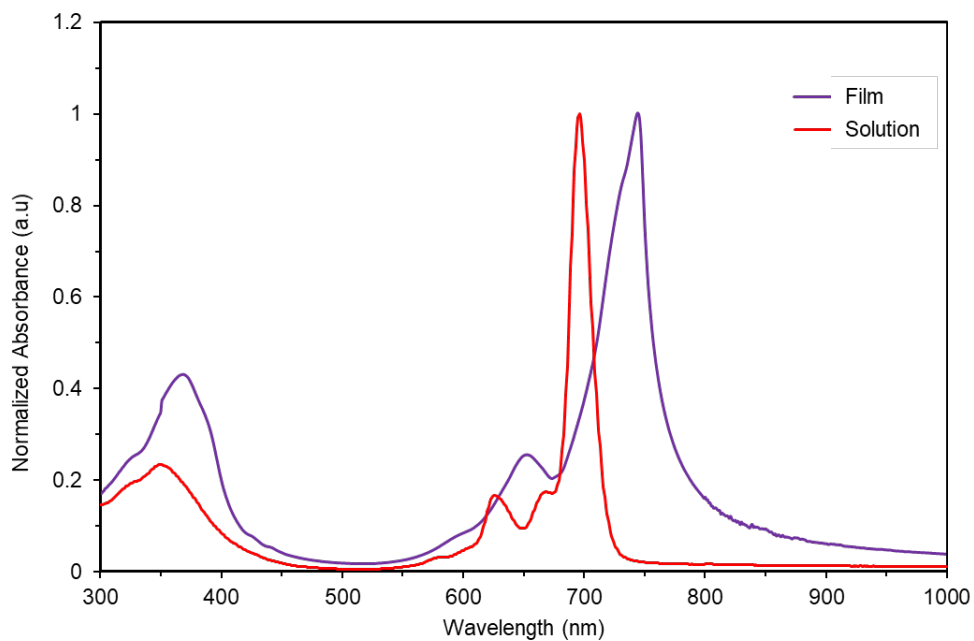

**Figure S2.** UV-Vis absorption spectra for F<sub>2</sub>-F<sub>16</sub>SiPc in solution (toluene) and as a thin film.

## Single-Crystal X-Ray Diffraction.

**Table S1.** Crystallographic data for F<sub>2</sub>-F<sub>16</sub>SiPc.

| Parameters                                            | F <sub>2</sub> -F <sub>16</sub> SiPc              |
|-------------------------------------------------------|---------------------------------------------------|
| Formula                                               | C <sub>32</sub> F <sub>18</sub> N <sub>8</sub> Si |
| Formula Weight                                        | 866.49                                            |
| Crystal System                                        | Tetragonal                                        |
| Space Group                                           | <i>I4/m</i>                                       |
| <i>a</i> (Å)                                          | 14.8862(6)                                        |
| <i>b</i> (Å)                                          | 14.8862(6)                                        |
| <i>c</i> (Å)                                          | 6.2150(3)                                         |
| $\alpha$ (°)                                          | 90                                                |
| $\beta$ (°)                                           | 90                                                |
| $\gamma$ (°)                                          | 90                                                |
| <i>V</i> (Å <sup>3</sup> )                            | 1377.24(13)                                       |
| <i>Z</i>                                              | 2                                                 |
| $\rho_{\text{calc}}$ (g·cm <sup>-3</sup> )            | 2.089                                             |
| <i>T</i> (K)                                          | 203(2)                                            |
| $\mu$ (mm <sup>-1</sup> )                             | 0.256                                             |
| 2 $\theta_{\text{max}}$ (°)                           | 27.541                                            |
| Total Reflections                                     | 866                                               |
| Unique Reflections                                    | 795                                               |
| R <sub>1</sub> , wR <sub>2</sub> (on F <sup>2</sup> ) | 0.0277, 0.0776                                    |

## OTFT Testing and Electrical Characterization & Thin-Film X-ray Diffraction

**Table S2.** Electrical performances of OTFTs<sup>a</sup> using **F<sub>2</sub>-F<sub>16</sub>SiPc** and **F<sub>16</sub>CuPc** as active layers characterized in N<sub>2</sub> and air.

| Material                             | Condition      | Dielectric           | $\mu_e$ [cm <sup>2</sup> ·V <sup>-1</sup> ·s <sup>-1</sup> ] <sup>a</sup> | $V_T$ [V] <sup>a</sup> | $I_{on}$ [A] <sup>a</sup> | $I_{on/off}$ <sup>a</sup>        | $\mu_{max}$ [cm <sup>2</sup> ·V <sup>-1</sup> ·s <sup>-1</sup> ] | n  |
|--------------------------------------|----------------|----------------------|---------------------------------------------------------------------------|------------------------|---------------------------|----------------------------------|------------------------------------------------------------------|----|
| F <sub>2</sub> -F <sub>16</sub> SiPc | N <sub>2</sub> | OTS-SiO <sub>2</sub> | 0.15 ± 0.036                                                              | 1.6 ± 0.52             | 9.34 × 10 <sup>-5</sup>   | 10 <sup>5</sup> -10 <sup>6</sup> | 0.30                                                             | 38 |
| F <sub>2</sub> -F <sub>16</sub> SiPc | Air            | OTS-SiO <sub>2</sub> | 0.072 ± 0.028                                                             | 11.4 ± 2.1             | 3.76 × 10 <sup>-5</sup>   | 10 <sup>5</sup>                  | 0.17                                                             | 34 |
| F <sub>16</sub> CuPc                 | N <sub>2</sub> | OTS-SiO <sub>2</sub> | 0.039 ± 0.014                                                             | 3.2 ± 3.2              | 1.23 × 10 <sup>-5</sup>   | 10 <sup>4</sup>                  | 0.063                                                            | 31 |
| F <sub>16</sub> CuPc                 | Air            | OTS-SiO <sub>2</sub> | 0.035 ± 0.013                                                             | 3.3 ± 3.2              | 1.12 × 10 <sup>-5</sup>   | 10 <sup>5</sup>                  | 0.061                                                            | 31 |
| F <sub>2</sub> -F <sub>16</sub> SiPc | N <sub>2</sub> | SiO <sub>2</sub>     | 0.025 ± 0.0087                                                            | -3.7 ± 2.5             | 1.67 × 10 <sup>-5</sup>   | 10 <sup>5</sup>                  | 0.059                                                            | 34 |
| F <sub>2</sub> -F <sub>16</sub> SiPc | Air            | SiO <sub>2</sub>     | 0.0084 ± 0.0042                                                           | 11.6 ± 2.0             | 3.24 × 10 <sup>-6</sup>   | 10 <sup>4</sup> -10 <sup>5</sup> | 0.020                                                            | 29 |
| F <sub>16</sub> CuPc                 | N <sub>2</sub> | SiO <sub>2</sub>     | 0.012 ± 0.0085                                                            | -0.2 ± 2.6             | 3.63 × 10 <sup>-6</sup>   | 10 <sup>2</sup> -10 <sup>3</sup> | 0.045                                                            | 27 |
| F <sub>16</sub> CuPc                 | Air            | SiO <sub>2</sub>     | 0.010 ± 0.0085                                                            | -1.3 ± 2.7             | 2.9 × 10 <sup>-6</sup>    | 10 <sup>3</sup> -10 <sup>4</sup> | 0.040                                                            | 26 |

<sup>a</sup>) Devices were fabricated using a BGTC architecture on Si/SiO<sub>2</sub> substrates with or without an OTS-modified dielectric layer and Ag source-drain electrodes.

<sup>b</sup>)  $\mu_e$  and  $V_T$  were calculated based on mean values, while  $I_{on}$  and  $I_{on/off}$  were calculated based on median values.

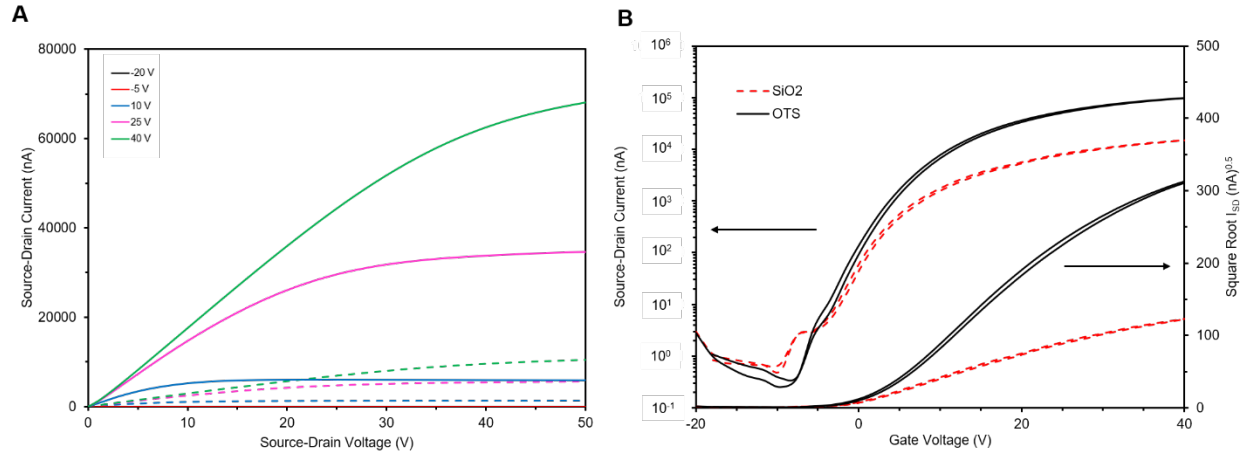

**Figure S3.** Representative (A) output and (B) transfer curves ( $V_{DS} = 50$  V) for BGTC OTFTs fabricated with **F<sub>2</sub>-F<sub>16</sub>SiPc** characterized in an inert (N<sub>2</sub>) atmosphere on OTS-modified SiO<sub>2</sub> (solid lines) and bare SiO<sub>2</sub> (dashed lines) as the dielectric

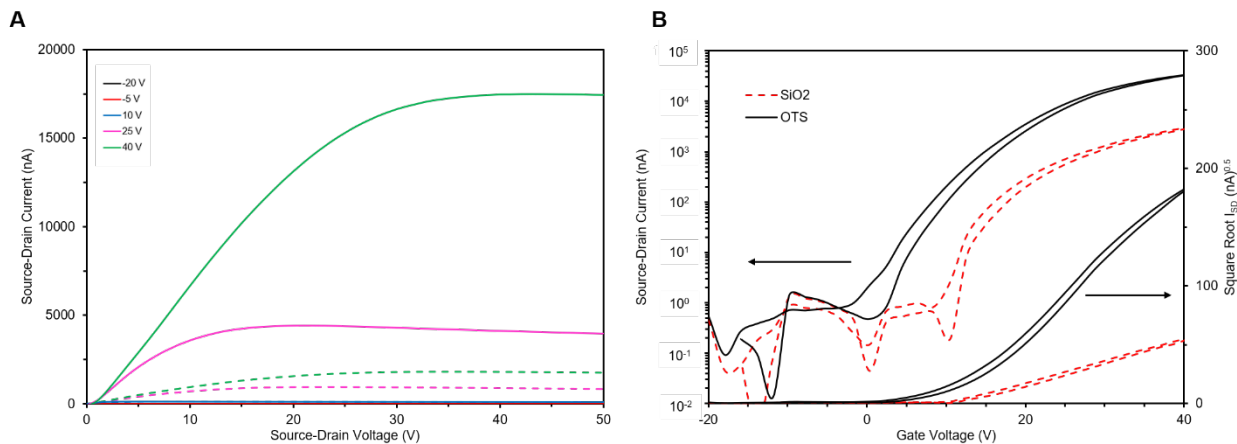

**Figure S4.** Representative (A) output and (B) transfer curves ( $V_{DS} = 50$  V) for BGTC OTFTs fabricated with **F<sub>2</sub>-F<sub>16</sub>SiPc** characterized in air on OTS-modified SiO<sub>2</sub> (solid lines) and bare SiO<sub>2</sub> (dashed lines) as the dielectric

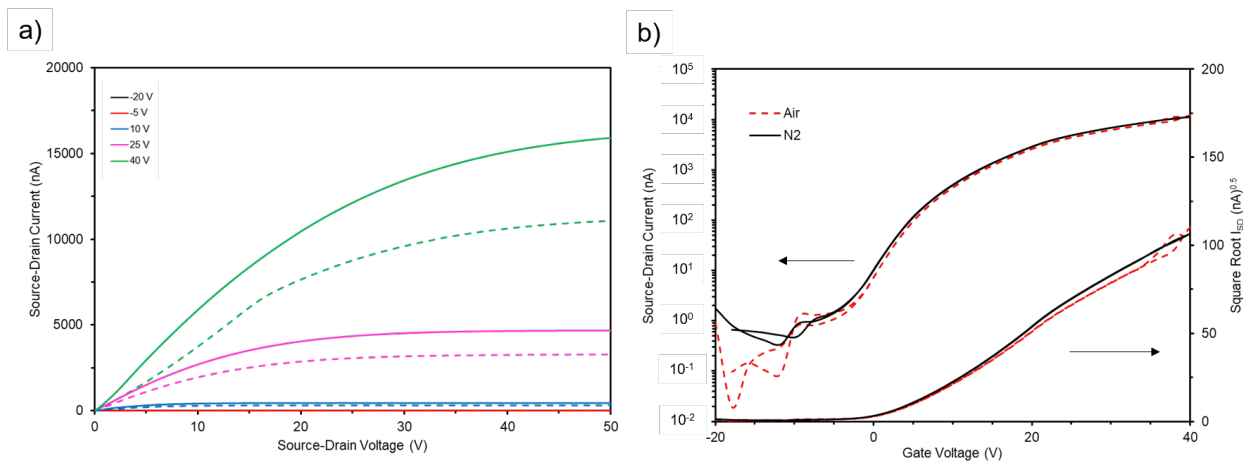

**Figure S5.** Representative (A) output and (B) transfer curves ( $V_{DS} = 50$  V) for BGTC OTFTs fabricated with **F<sub>16</sub>CuPc** on an OTS-modified substrate characterized in an inert (N<sub>2</sub>) atmosphere (solid lines) and in air (dashed lines)

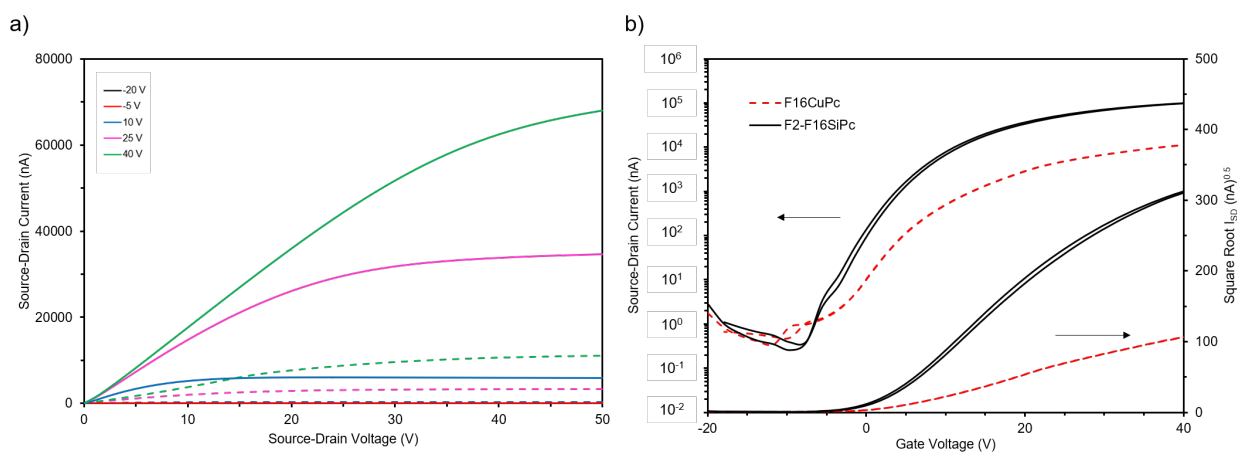

**Figure S6.** Representative (A) output and (B) transfer curves ( $V_{DS} = 50$  V) for BGTC OTFTs fabricated with **F<sub>2</sub>-F<sub>16</sub>SiPc** (solid lines) and **F<sub>16</sub>CuPc** (dashed lines) on an OTS-modified substrate characterized in an inert (N<sub>2</sub>) atmosphere

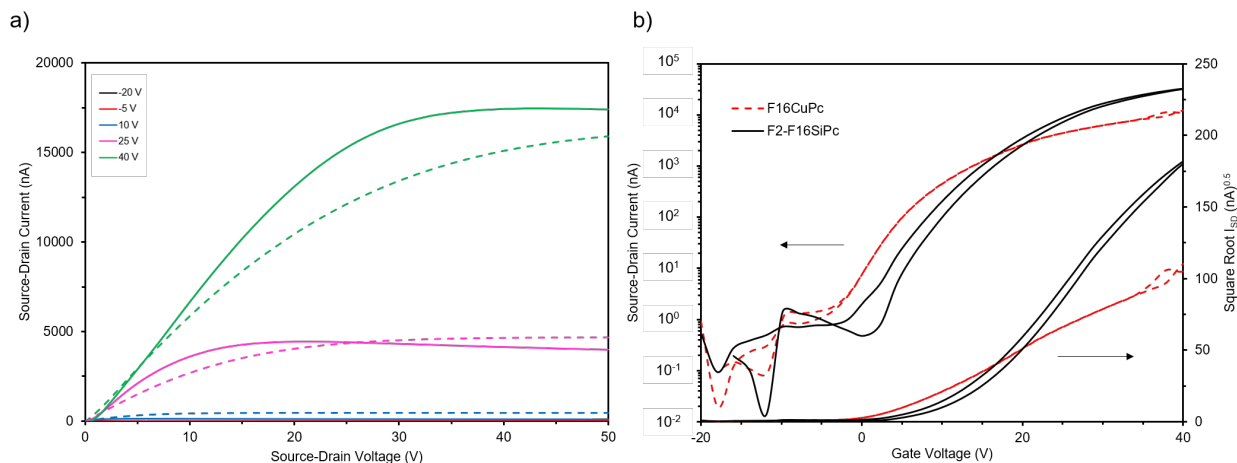

**Figure S7.** Representative (A) output and (B) transfer curves ( $V_{DS} = 50$  V) for BGTC OTFTs fabricated with **F<sub>2</sub>-F<sub>16</sub>SiPc** (solid lines) and **F<sub>16</sub>CuPc** (dashed lines) on an OTS-modified substrate characterized in air

**Table S3.** Electrical performance of **F<sub>2</sub>-F<sub>16</sub>SiPc** in BGBC device architectures with Au/ITO electrodes characterized in vacuum and air

| Condition           | Channel Length ( $\mu\text{m}$ ) | $\mu_e \times 10^{-3}$ [ $\text{cm}^2 \cdot \text{V}^{-1} \cdot \text{s}^{-1}$ ] | $V_T$ [V]       | $I_{on}$ [A]          | $I_{on/off}$    |
|---------------------|----------------------------------|----------------------------------------------------------------------------------|-----------------|-----------------------|-----------------|
| Vacuum              |                                  | $5.3 \pm 1.2$                                                                    | $2.1 \pm 2.2$   | $3.56 \times 10^{-6}$ | $10^5$          |
| Air (t = 5 minutes) | 20                               | $3.7 \pm 0.41$                                                                   | $5.4 \pm 1.2$   | $2.23 \times 10^{-6}$ | $10^4$          |
| Air (t = 6 months)  |                                  | $0.64 \pm 0.39$                                                                  | $12.1 \pm 1.9$  | $3.54 \times 10^{-7}$ | $10^4$          |
| Vacuum              |                                  | $6.3 \pm 2.4$                                                                    | $-3.5 \pm 2.7$  | $9.28 \times 10^{-6}$ | $10^5$          |
| Air (t = 5 minutes) | 10                               | $2.7 \pm 1.5$                                                                    | $3.7 \pm 0.43$  | $3.72 \times 10^{-6}$ | $10^4$ - $10^5$ |
| Air (t = 6 months)  |                                  | $0.54 \pm 0.38$                                                                  | $9.1 \pm 1.5$   | $4.45 \times 10^{-7}$ | $10^4$ - $10^5$ |
| Vacuum              |                                  | $7.8 \pm 2.6$                                                                    | $-2.3 \pm 1.4$  | $1.99 \times 10^{-5}$ | $10^5$ - $10^6$ |
| Air (t = 5 minutes) | 5                                | $3.3 \pm 1.7$                                                                    | $1.8 \pm 2.7$   | $1.05 \times 10^{-5}$ | $10^4$ - $10^5$ |
| Air (t = 6 months)  |                                  | $0.49 \pm 0.44$                                                                  | $4.6 \pm 1.9$   | $8.95 \times 10^{-7}$ | $10^4$ - $10^5$ |
| Vacuum              |                                  | $10.1 \pm 4.2$                                                                   | $-4.7 \pm 0.60$ | $7.35 \times 10^{-5}$ | $10^4$ - $10^5$ |
| Air (t = 5 minutes) | 2.5                              | $4.9 \pm 0.81$                                                                   | $0.19 \pm 0.99$ | $4.04 \times 10^{-5}$ | $10^5$          |
| Air (t = 6 months)  |                                  | $0.54 \pm 0.30$                                                                  | $6.7 \pm 0.74$  | $2.81 \times 10^{-6}$ | $10^4$          |

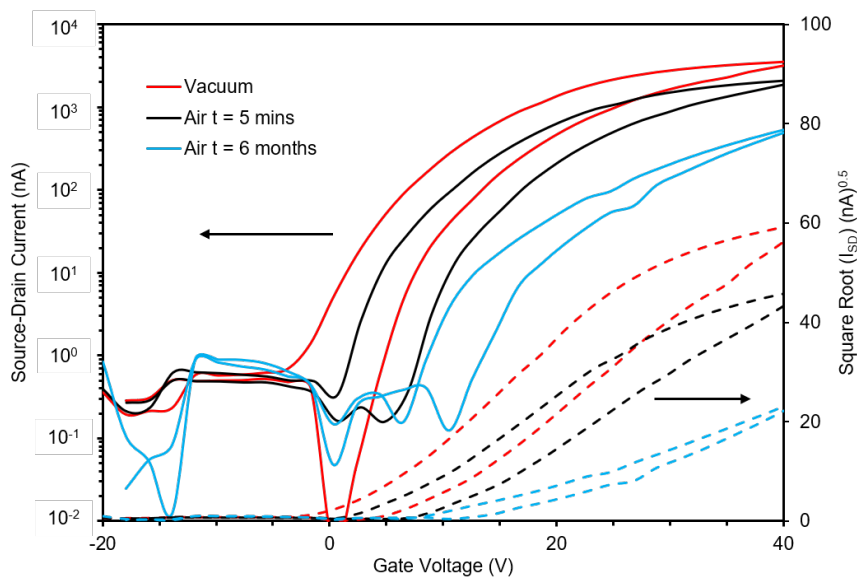

**Figure S8.** Representative transfer curves (solid lines) and  $\sqrt{I_{SD}}$  vs  $V_G$  (dashed lines) for stability study of  $F_2-F_{16}SiPc$  in a BGBC architecture ( $V_{DS} = 50V$ ) where  $L = 20 \mu m$ .

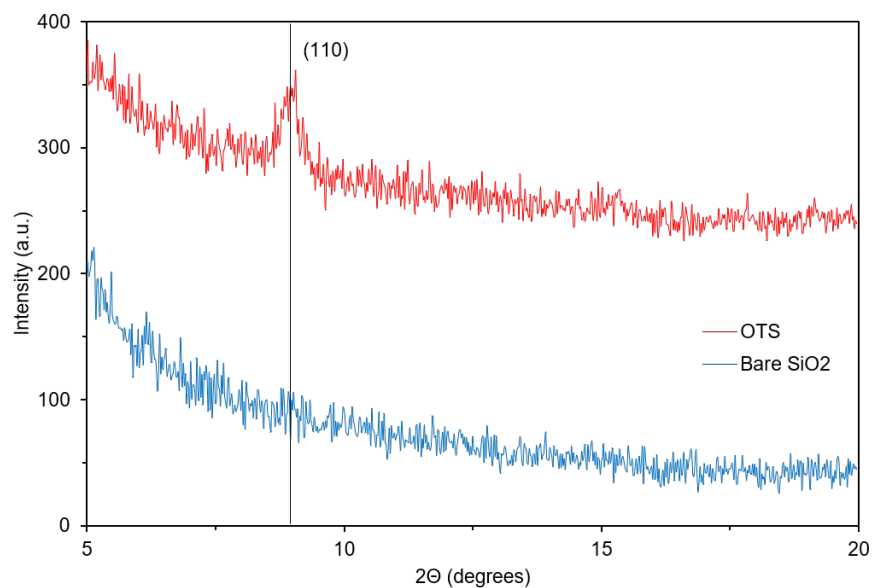

**Figure S9** PXRD traces of  $F_2-F_{16}SiPc$  deposited on OTS and bare  $SiO_2$  substrates with diffraction peak corresponding to the 110 plane of the single-crystal structure.

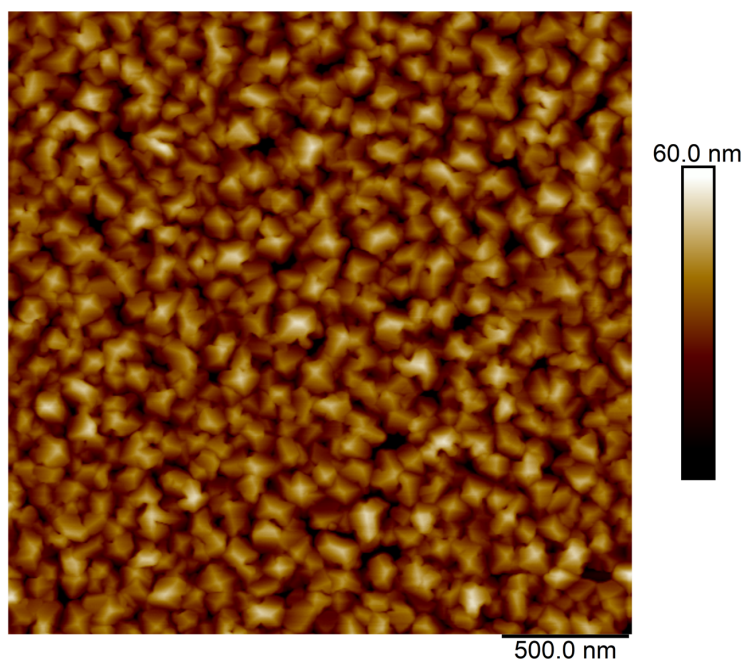

**Figure S10.** AFM image of  $F_2-F_{16}SiPc$  deposited on a bare  $SiO_2$  substrate

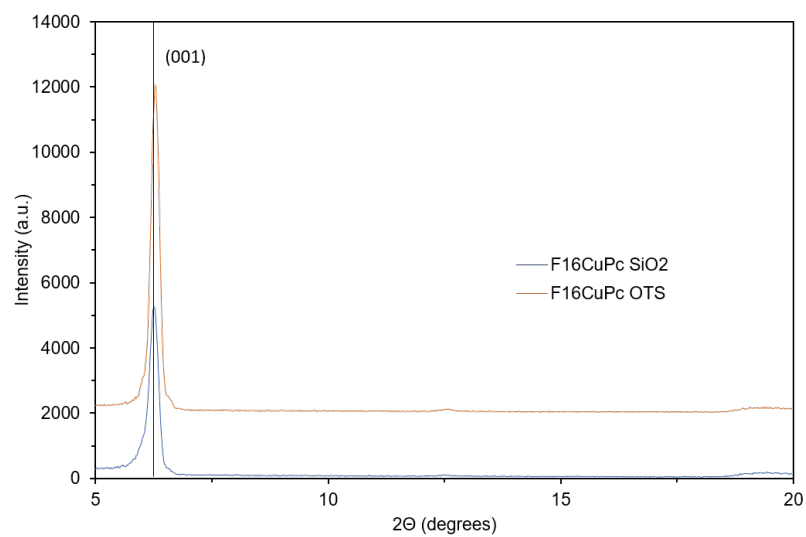

**Figure S11.** PXRD traces of  $F_{16}CuPc$  deposited on OTS and bare  $SiO_2$  substrates with diffraction plane corresponding to the single crystal identified.
